# Supplementary material for: Self-Assembly System Based on Cyclodextrin for Targeted Delivery of Cannabidiol
Source: PubMed Central journal article supplement (PMC8606678; doi:10.3389/fchem.2021.754832), 2021-11-08
Supplement: Presentation1.pdf [file Presentation1.pdf]

# Self-assembly system based on cyclodextrin for targeted delivery of cannabidiol

Panyong Zhu<sup>1,a</sup>, Pin Lv<sup>1,a,b,\*</sup>, Yazhou Zhang<sup>a</sup>, Rongqiang Liao<sup>c,\*</sup>, Jing Liu<sup>d</sup>, Rong Guo<sup>b</sup>,  
Xuan Chen<sup>b</sup>, Xiali Liao<sup>a</sup>, Chuanzhu Gao<sup>a</sup>, Kun Zhang<sup>e</sup>, Ming Yang<sup>b,\*</sup>, Bo Yang<sup>a,\*</sup>

*a: Faculty of Life Science and Technology, Kunming University of Science and Technology, Kunming 650500, PR China.*

*b: Industrial Crop Research Institute, Yunnan Academy of Agricultural Sciences, Kunming, 650205, PR China.*

*c: Department of pharmacy, Chongqing Emergency Medical Center, Chongqing University Central Hospital, Chongqing 400014, PR China.*

*d: The Affiliated of Stomatology, Kunming Medical University, Kunming 650000, PR China.*

*e: School of Agriculture, Yunnan University, Yunnan University, Kunming 650500, PR China.*

## Contents

|                                                               |   |
|---------------------------------------------------------------|---|
| 1. Standard curve of AD-CBD .....                             | 2 |
| 2. <sup>1</sup> H NMR spectra of AD-CBD.....                  | 2 |
| 3. <sup>13</sup> C NMR spectra of AD-CBD.....                 | 3 |
| 4. ESI-MS of AD-CBD .....                                     | 3 |
| 5. The stability of AD-CBD/BIO-CD in different pH media ..... | 4 |

---

\* Corresponding author. E-mail addresses: lvpin\_342526463@qq.com (P. Lv), Rongqiang Liao liaorongqiang@126.com (R. Liao), yangbo6910@sina.com (B. Yang), ymhemp@163.com (M. Yang).

1. These authors have contributed equally to this work and share first authorship.

## Experimental section.

### 1. Standard curve of AD-CBD

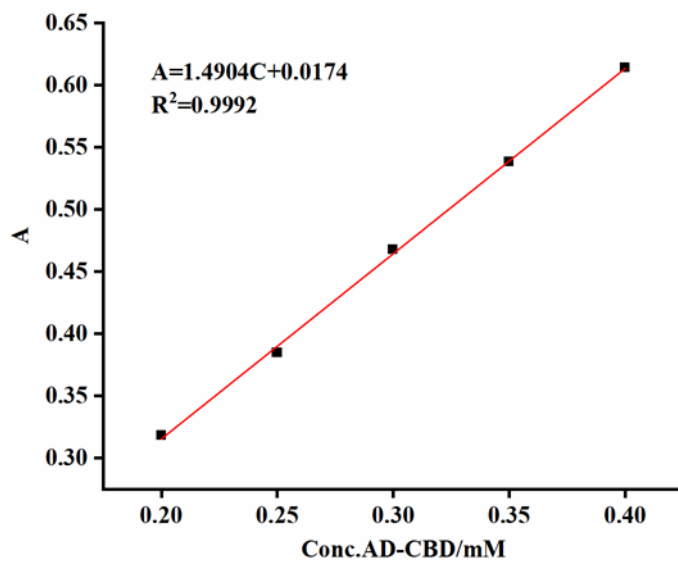

Fig. S1. Standard curve of AD-CBD.

### 2. $^1\text{H}$ NMR spectra of AD-CBD.

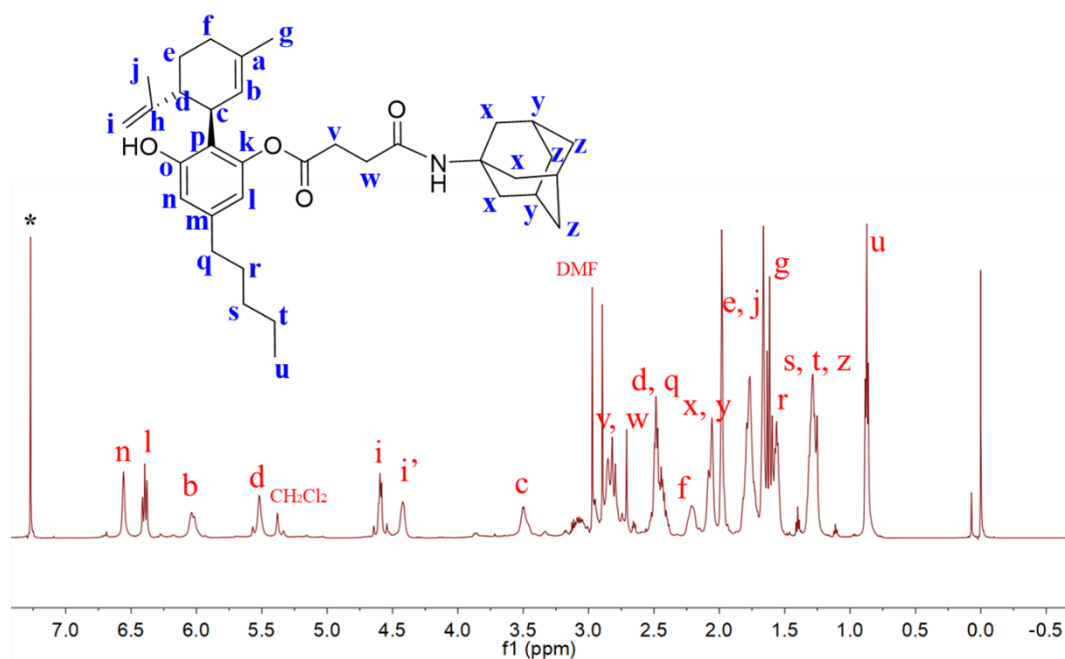

Fig. S2.  $^1\text{H}$  NMR spectra of AD-CBD.

3.  $^{13}\text{C}$  NMR spectra of AD-CBD

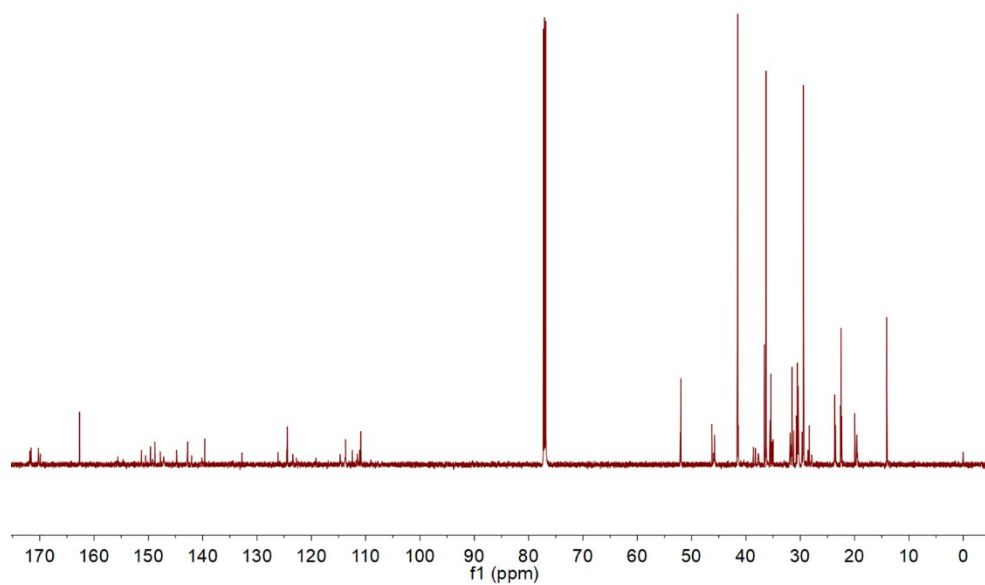

Fig. S3.  $^{13}\text{C}$  NMR spectra of AD-CBD.

4. ESI-MS of AD-CBD

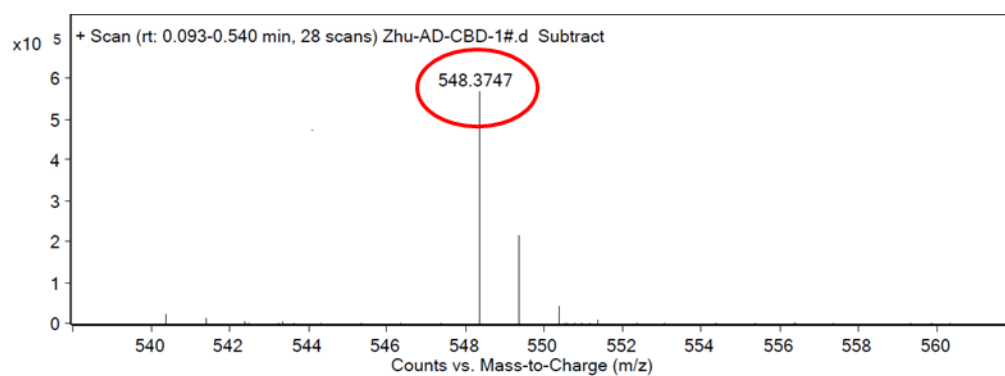

Fig. S4. ESI-MS of AD-CBD.

5. The stability of AD-CBD/BIO-CD in different pH media

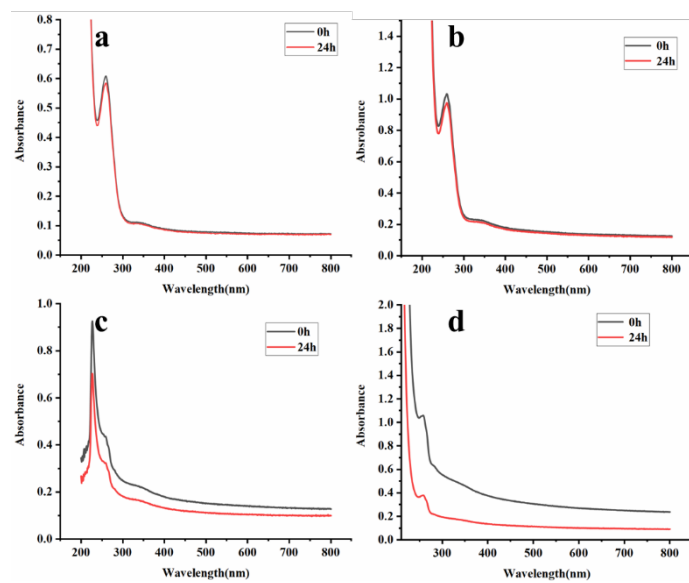

Fig. S5. The stability of AD-CBD/BIO-CD in different pH media
